# Supplementary material
Source: PubMed Central journal article supplement (PMC3511638)
Supplement: NIHMS398238-supplement-01.pdf [file NIHMS398238-supplement-01.pdf]

### Supplementary Table 1. List of melanoma patient specimens used in this study and the intensity of ASC staining

| Patients | Gender | Age | Type       | Origin        | Intensity of ASC staining <sup>1</sup> |
|----------|--------|-----|------------|---------------|----------------------------------------|
| MF347    | Female | 55  | Primary    | Skin          | ++                                     |
| MF348    | Female | 86  | Primary    | Skin          | +                                      |
| MB947p   | Female | 65  | Primary    | Skin          | +                                      |
| MF564    | Male   | 87  | Primary    | Skin          | +                                      |
| MF565    | Male   | 76  | Primary    | Skin          | +                                      |
| MF566    | Male   | 35  | Primary    | Skin          | ++                                     |
| MB947m   | Female | 65  | Metastasis | Lymph node    | +                                      |
| MB952    | Female | 77  | Metastasis | Lymph node    | -                                      |
| 82909    | Male   | 56  | Metastasis | Adrenal gland | +/-                                    |
| MF567    | Male   | 60  | Metastasis | Skin          | -                                      |
| MF568    | Male   | 64  | Metastasis | Skin          | +/-                                    |
| MF569    | Male   | 62  | Metastasis | Skin          | +                                      |

<sup>1</sup>ASC staining was reviewed by 2 observers. ++, strongly positive; +, positive; +/-, weakly positive; -, slightly positive or undetectable

## Supplementary Figure 1

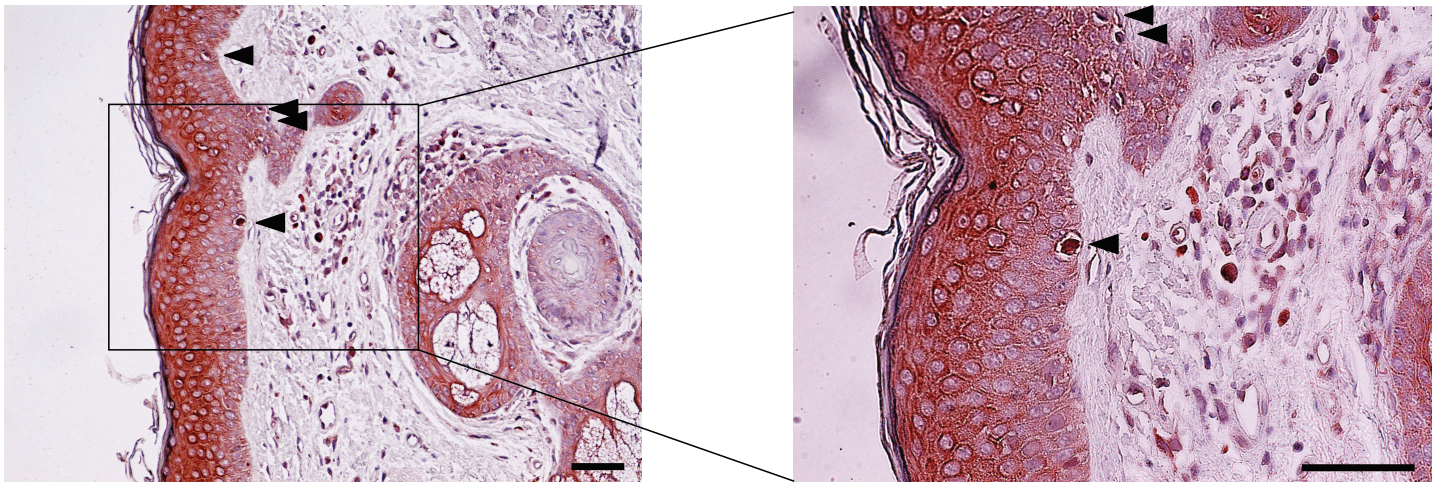

**Figure 1. ASC expression in melanocytes.** Representative staining of human skin with ASC. Arrows depict positively stained melanocytes. Bar=100  $\mu\text{m}$ .

## Supplementary Figure 2

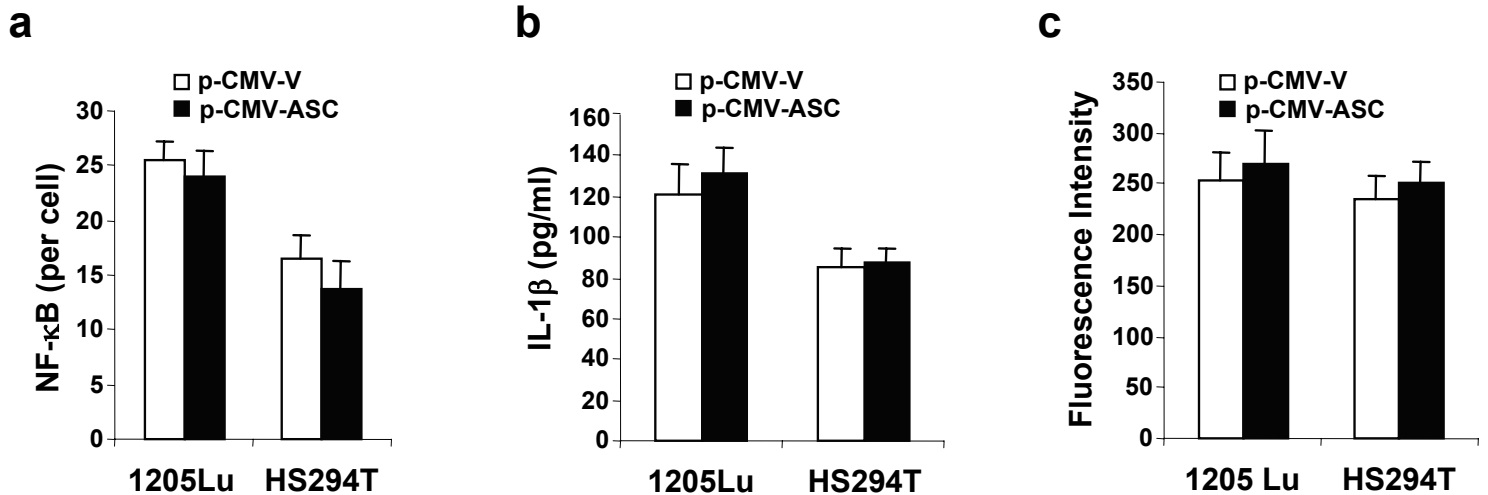

**Supplementary Figure 2. NF-κB activity, IL-1b secretion and caspase-1 activity in metastatic melanoma cells after ASC overexpression.** (a) NF-κB activity in melanoma cells after transfection with pCMV-GFP-V empty vector (pCMV-V) or pCMV-GFP-ASC vector (pCMV-ASC). (b) IL-1β secretion in 24 hours in cells after transfection with pCMV-V or pCMV-ASC. Data represent mean + S.E. (n=3). (c) Caspase-1 activity in cells after transfection with pCMV-V or pCMV-ASC. Data represent mean + S.E. (n=3).
